# Supplementary material for: Ion Conductance-Based Perfusability Assay of Vascular Vessel Models in Microfluidic Devices
Source: MDPI journal article supplement (doi:10.3390/mi12121491), 2021-11-30
Supplement: s1 [file s1]

## **Supporting information for**

### **Ion conductance-based perfusability assay of vascular vessel models in microfluidic devices**

Rise Akasaka<sup>1</sup>, Masashi Ozawa<sup>2</sup>, Yuji Nashimoto<sup>2,3</sup>, Kosuke Ino<sup>2,\*</sup>, Hitoshi Shiku<sup>2,\*</sup>

<sup>1</sup> Graduate School of Environmental Studies, Tohoku University, 6-6-11 Aramaki-aza Aoba, Aoba-ku, Sendai 980-8579, Japan

<sup>2</sup> Graduate School of Engineering, Tohoku University, 6-6-11 Aramaki-aza Aoba, Aoba-ku, Sendai 980-8579, Japan

<sup>3</sup> Frontier Research Institute for Interdisciplinary Sciences, Tohoku University, 6-3 Aramaki-aza Aoba, Aoba-ku, Sendai 980-8578, Japan

Corresponding authors: Kosuke Ino (kosuke.ino@tohoku.ac.jp) and Hitoshi Shiku (hitoshi.shiku.c3@tohoku.ac.jp)

#### **Table of Contents**

- Figure S1
- Figure S2

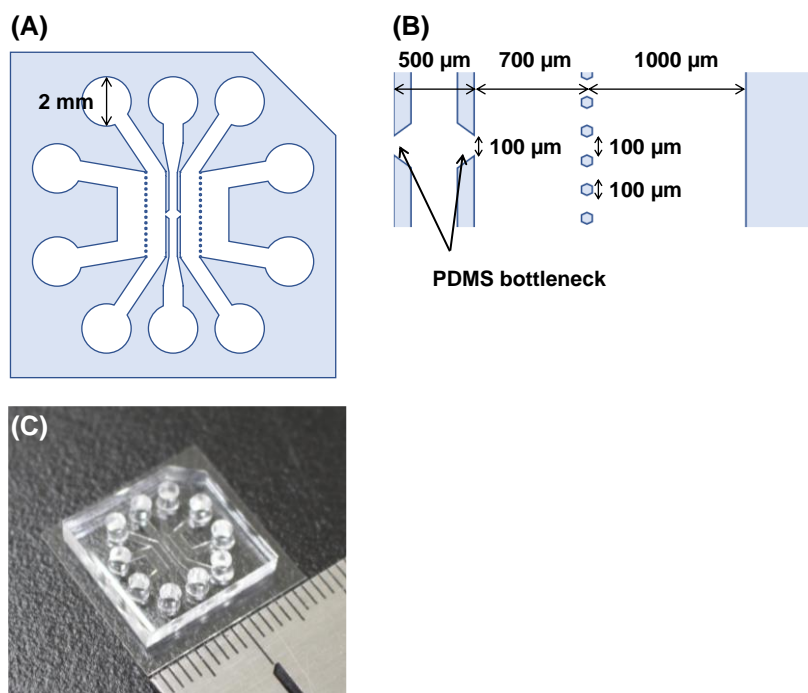

**Figure S1**

Device dimensions. (A) Overview. (B) Detailed information. The heights of all the channels were 100  $\mu\text{m}$ . (C) Device photograph.

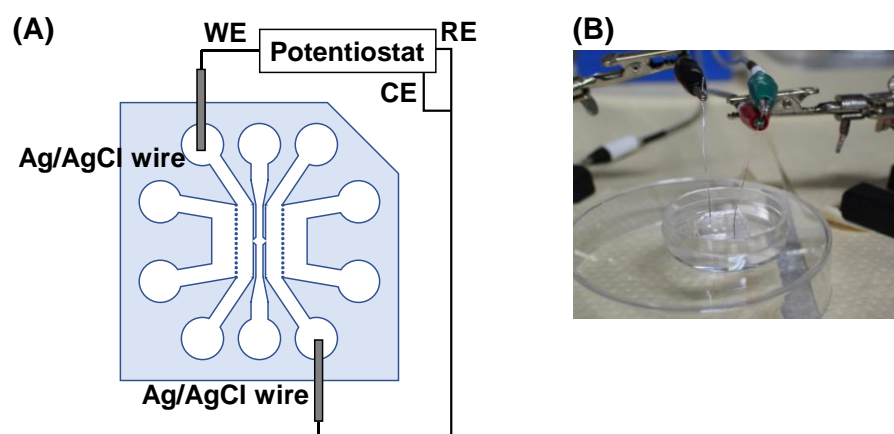

**Figure S2**

Device during the measurements. (A) Illustration. WE: working electrode. CE: counter electrode. RE: reference electrode. (B) Photograph.
